# Supplementary material for: Distinct Roles of Hand2 in Initiating Polarity and Posterior Shh Expression during the Onset of Mouse Limb Bud Development
Source: PubMed Central journal article supplement (PMC2851570; doi:10.1371/journal.pgen.1000901), 2010-04-08

Figure S5

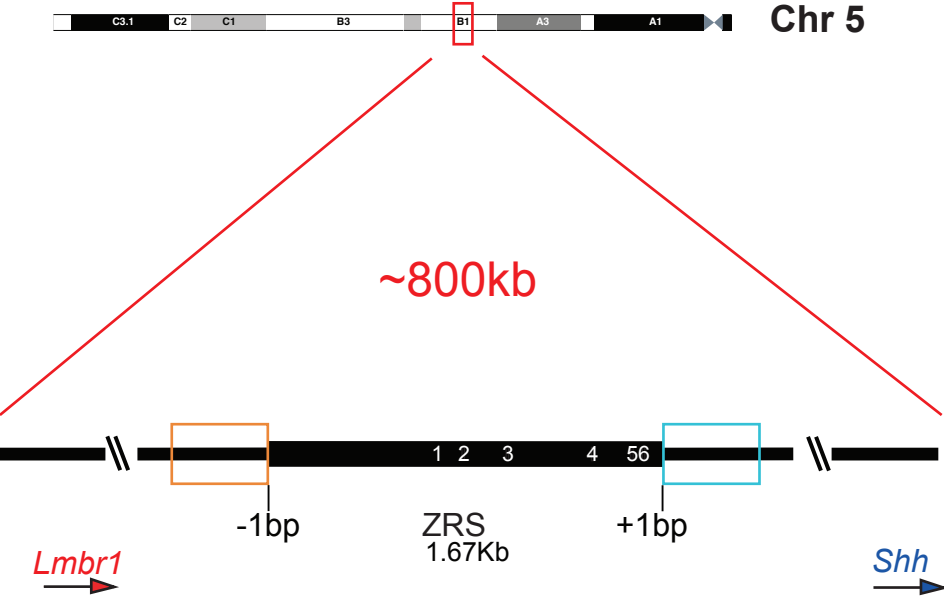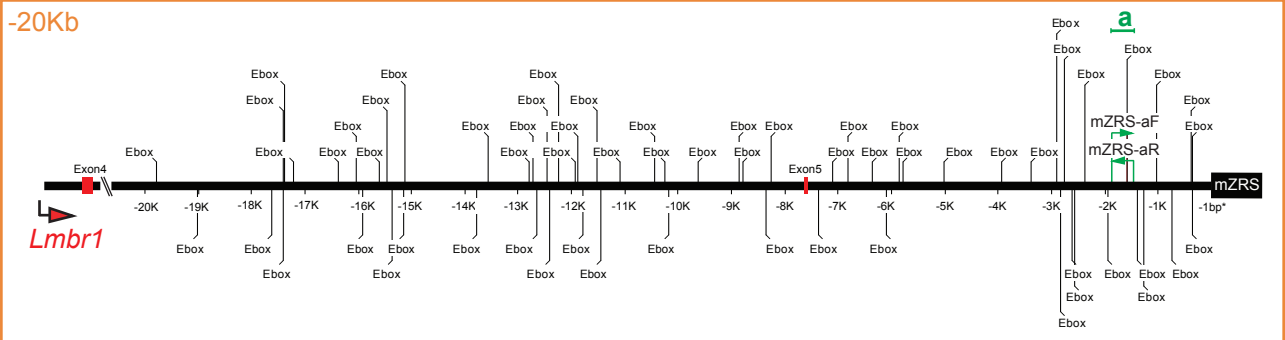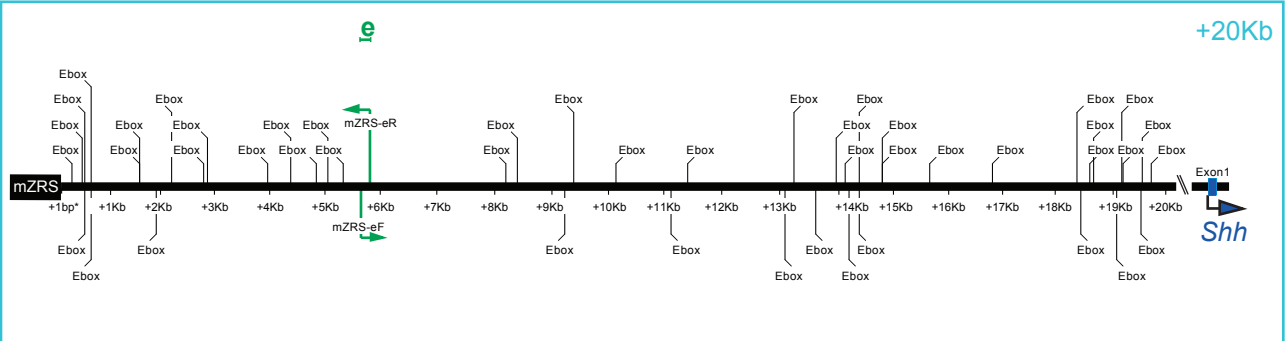

Supplement: pgen.1000901.s005.pdf [file pgen.1000901.s005.pdf]
